# Supplementary material for: The Plasmid pEX18Gm Indirectly Increases Caenorhabditis elegans Fecundity by Accelerating Bacterial Methionine Synthesis
Source: MDPI journal article supplement (doi:10.3390/ijms23095003), 2022-04-30
Supplement: s1 [file s1]

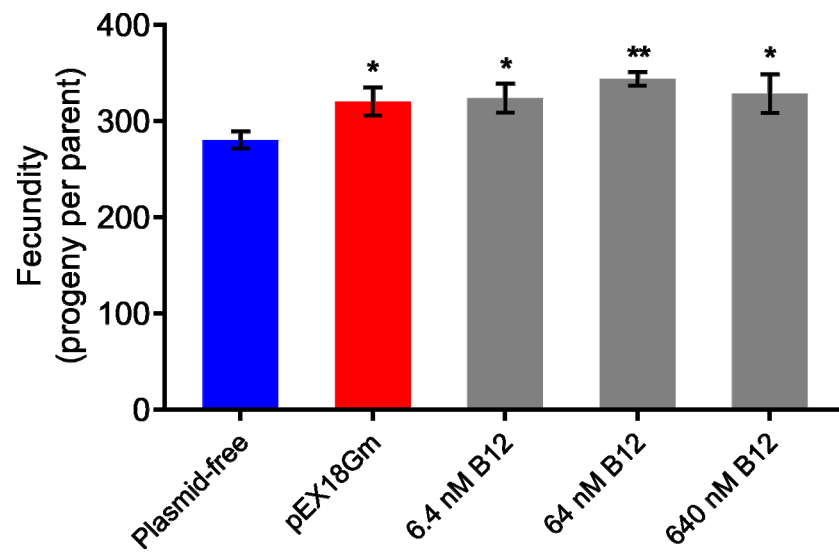

**Figure S2.** Fecundity of *C. elegans* in *E. coli* OP50 diet on NGM plates supplemented with different concentrations of Vitamin B12 (B12). Error bars indicate  $\pm$  SEM. \* $p < 0.05$ ; \*\* $p < 0.01$  by Tukey multiple comparison test.
