# Supplementary material for: The Plasmid pEX18Gm Indirectly Increases Caenorhabditis elegans Fecundity by Accelerating Bacterial Methionine Synthesis
Source: MDPI journal article supplement (doi:10.3390/ijms23095003), 2022-04-30
Supplement: s1 [file s1]

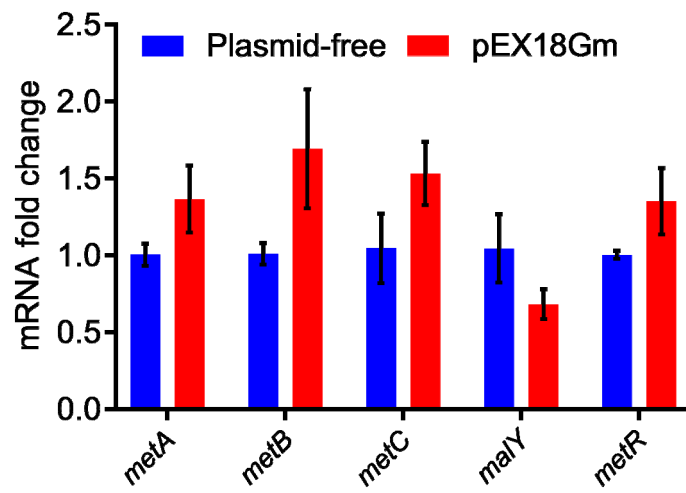

**Figure S2.** mRNA expression of methionine synthesis related genes in plasmid-free *E. coli* OP50 and *E. coli* OP50 harboring pEX18Gm. qRT-PCR data, normalized to the gene levels in *E. coli* OP50, the house-keeping gene used *gapA*.
