# Supplementary material for: The Plasmid pEX18Gm Indirectly Increases Caenorhabditis elegans Fecundity by Accelerating Bacterial Methionine Synthesis
Source: MDPI journal article supplement (doi:10.3390/ijms23095003), 2022-04-30
Supplement: s1 [file s1]

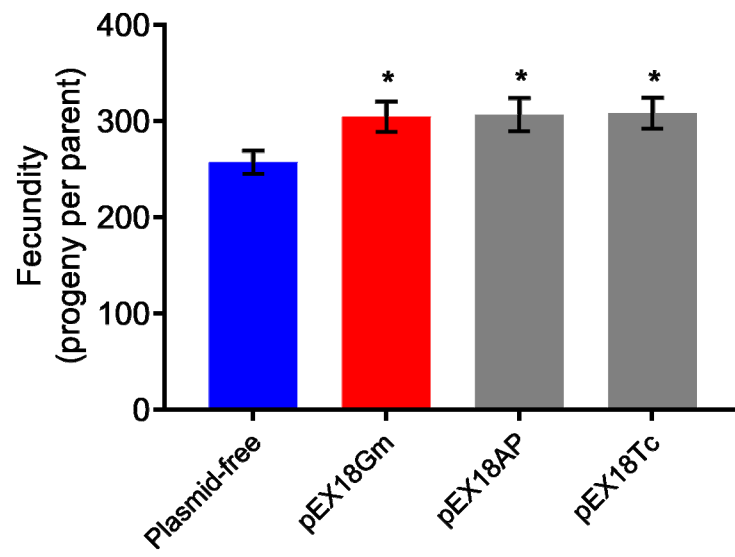

**Figure S4.** *C. elegans* fecundity response to feeding on *E. coli* OP50 harboring pEX18Gm, pEX18Ap and pEX18Tc, respectively. \* $p < 0.05$  by Tukey multiple comparison test.
