# Supplementary material for: The Plasmid pEX18Gm Indirectly Increases Caenorhabditis elegans Fecundity by Accelerating Bacterial Methionine Synthesis
Source: Int J Mol Sci. 2022 Apr 30;23(9):5003. doi: 10.3390/ijms23095003 (PMC9102816; doi:10.3390/ijms23095003)
Supplement: Supplementary file 1 [file ijms-23-05003-s001.zip]

Archive with 7 entries (7 files):
- Figure S1. The response of E. coli OP50 growth rate to plasmid pEX18Gm in liquid LB medium.pdf
- Figure S2. mRNA expression of methionine synthesis related genes in plasmid-free E. coli OP50 and E. coli OP50 harboring pEX18Gm.pdf
- Figure S3. Fecundity of C. elegans in E. coli OP50 diet on NGM plates supplemented with different concentrations of Vitamin B12.pdf
- Figure S4. C. elegans fecundity response to feeding on E. coli OP50 harboring pEX18Gm,  pEX18Ap and pEX18Tc, respectively.pdf
- Figure S5. C. elegans fecundity response to feeding on E. coli OP50 harboring pEX18GmañsacB,  pEX18ApañsacB and pEX18TcañsacB, respectively.pdf
- Table S1. List of 109 candidate genes selected by RNA-seq.xlsx
- Table S2. List of oligonucleotides.xlsx
