# Supplementary material for: The Plasmid pEX18Gm Indirectly Increases Caenorhabditis elegans Fecundity by Accelerating Bacterial Methionine Synthesis
Source: Int J Mol Sci. 2022 Apr 30;23(9):5003. doi: 10.3390/ijms23095003 (PMC9102816; doi:10.3390/ijms23095003)
Supplement: Supplementary file 1 [file ijms-23-05003-s001.zip › Table S1. List of 109 candidate genes selected by RNA-seq.xlsx]

## Sheet: Sheet1
	Gene expression (RPKM)										KEGG annotation
gene name	OP50(1)	OP50(2)	OP50(3)	pBBR1MCS-5(1)	pBBR1MCS-5(2)	pBBR1MCS-5(3)	pEX18Gm(1)	pEX18Gm(2)	pEX18Gm(3)	Change	layer1	layer2
galM	176.792	164.214	123.895	191.407	179.468	133.678	288.063	672.258	597.728	Up-regulated	Metabolism	Carbohydrate metabolism
galK	96.259	96.877	106.901	59.027	79.921	69.894	295.582	1024	782.542	Up-regulated	Metabolism	Carbohydrate metabolism
galT	92.783	98.016	94.819	59.666	68.316	72.498	361.048	932.132	762.131	Up-regulated	Metabolism	Carbohydrate metabolism
galE	154.879	158.196	134.578	80.233	98.628	70.169	643.394	1449.44	1184.5	Up-regulated	Metabolism	Carbohydrate metabolism
kdgK	17.092	16.031	7.449	16.227	3.505	5.637	87.987	47.815	63.211	Up-regulated	Metabolism	Carbohydrate metabolism
ulaF	9.513	11.583	5.963	4.853	9.49	5.494	2.258	1.415	2.338	Down-regulated	Metabolism	Carbohydrate metabolism
ppnP	22.931	16.367	6.975	20.934	6.536	11.772	74.16	32.683	87.917	Up-regulated	Metabolism	Nucleotide metabolism
glsA	101.211	118.227	93.104	374.936	141.447	375.39	844.826	1427.32	1639.23	Up-regulated	Metabolism	Amino acid metabolism
puuA	156.355	96.363	60.113	159.154	78.694	122.992	15.305	21.634	13.809	Down-regulated	Metabolism	Amino acid metabolism
puuD	42.859	40.531	18.426	34.407	30.801	69.437	5.957	6.353	7.139	Down-regulated	Metabolism	Amino acid metabolism
puuC	18.536	8.237	14.129	16.628	7.26	12.964	4.561	2.014	1.943	Down-regulated	Metabolism	Amino acid metabolism
gadB	303.287	525.674	272.521	3233	409.362	2132.89	9378.71	7916.91	8205.4	Up-regulated	Metabolism	Amino acid metabolism
ggt	7.467	4.355	5.668	11.93	5.717	7.459	54.845	35.457	55.106	Up-regulated	Metabolism	Amino acid metabolism
gpmM	44.451	46.058	28.775	63.32	53.168	47.682	152.614	128.181	191.91	Up-regulated	Metabolism	Amino acid metabolism
kbl	92.214	104.76	49.219	67.288	21.786	54.245	300.82	195.288	258.707	Up-regulated	Metabolism	Amino acid metabolism
glmS	523.151	564.479	406.21	561.097	361.898	356.116	144.74	93.701	115.154	Down-regulated	Metabolism	Amino acid metabolism
metH	23.227	25.523	17.235	31.938	11.604	14.457	69.188	44.83	79.786	Up-regulated	Metabolism	Amino acid metabolism
rfaD	132.197	98.13	89.811	187.515	109.804	99.859	395.291	388.494	574.3	Up-regulated	Metabolism	Glycan biosynthesis and metabolism
waaF	39.039	30.663	23.705	85.811	32.824	41.856	209.647	133.372	309.577	Up-regulated	Metabolism	Glycan biosynthesis and metabolism
waaC	9.923	10.194	8.911	26.23	9.313	11.212	92.307	47.755	76.294	Up-regulated	Metabolism	Glycan biosynthesis and metabolism
waaL	2.11	4.065	1.482	7.103	1.257	4.049	24.315	9.514	19.376	Up-regulated	Metabolism	Glycan biosynthesis and metabolism
waaG	11.077	11.22	6.854	20.199	10.1	13.917	58.171	26.855	65.389	Up-regulated	Metabolism	Glycan biosynthesis and metabolism
phoA	3.09	2.132	0.553	2.726	1.184	1.53	9.86	4.519	7.94	Up-regulated	Metabolism	Metabolism of cofactors and vitamins
yidA	12.739	10.013	10.003	37.88	23.255	17.71	123.307	69.64	126.835	Up-regulated	Metabolism	Metabolism of cofactors and vitamins
rpmB	254.953	244.29	147.423	347.994	295.12	220.004	1030.48	570.744	1072.14	Up-regulated	Genetic Information Processing	Translation
htpG	86.576	71.415	34.859	159.474	62.188	100.498	373.848	237.334	365.61	Up-regulated	Genetic Information Processing	Folding, sorting and degradation
groL	208.387	169.711	55.046	292.942	87.818	130.707	1746.09	656.933	1052.84	Up-regulated	Genetic Information Processing	Folding, sorting and degradation
tag	6.579	5.352	2.563	8.867	3.963	6.816	41.084	15.797	32.465	Up-regulated	Genetic Information Processing	Replication and repair
mutM	1.368	0.678	1.116	3.033	2.07	1.812	13.166	9.5	13.087	Up-regulated	Genetic Information Processing	Replication and repair
sapC	126.183	114.664	122.441	120.727	238.531	182.383	22.633	38.726	40.019	Down-regulated	Environmental Information Processing	Membrane transport
sapB	152.162	158.5	148.355	139.147	323.75	211.274	29.608	52.741	51.544	Down-regulated	Environmental Information Processing	Membrane transport
znuA	9.142	6.96	6.392	15.799	8.285	5.469	72.013	39.327	102.603	Up-regulated	Environmental Information Processing	Membrane transport
znuC	12.308	9.316	6.693	13.927	12.073	6.934	51.939	36.32	76.485	Up-regulated	Environmental Information Processing	Membrane transport
yejA	5.554	7.912	3.385	12.085	6.004	5.237	24.412	20.618	26.548	Up-regulated	Environmental Information Processing	Membrane transport
yejB	4.046	4.176	3.961	7.452	2.296	2.745	18.594	9.394	21.709	Up-regulated	Environmental Information Processing	Membrane transport
yejE	3.131	2.229	4.404	7.696	1.18	3.066	14.836	8.605	16.281	Up-regulated	Environmental Information Processing	Membrane transport
nlpA	6.019	8.152	5.59	14.141	9.211	12.033	42.143	31.647	61.972	Up-regulated	Environmental Information Processing	Membrane transport
phoP	32.802	33.346	17.211	43.217	20.096	28.186	97.385	81.6	139.107	Up-regulated	Environmental Information Processing	Signal transduction
atoE	1.13	0.76	1.002	1.459	0.704	1.057	0.44	0.429	0	Down-regulated	Environmental Information Processing	Signal transduction
gadC	209.853	354.304	205.703	1748.61	269.699	1488.39	3077.61	4311.13	3412.93	Up-regulated	Cellular Processes	Cellular community - prokaryotes
insI-1	3.51	3.255	3.033	3.656	1.051	1.456	11.614	5.976	15.337	Up-regulated	Unknown
rihA	16.213	15.733	7.53	22.778	3.582	6.945	53.552	35.393	45.646	Up-regulated	Unknown
ybjX	16.398	16.395	7.522	16.876	4.596	10.417	104.373	99.351	243.596	Up-regulated	Unknown
ycaD	8.435	4.776	9.385	17.792	10.78	15.755	2.869	1.48	3.075	Down-regulated	Unknown
zapC	8.364	4.716	5.325	14.866	1.372	4.376	85.525	43.109	121.277	Up-regulated	Unknown
cbpM	32.579	57.389	20.474	120.426	30.74	89.766	227.806	238.229	335.933	Up-regulated	Unknown
cbpA	65.005	109.737	38.917	221.205	66.235	208.316	422.864	452.743	626.428	Up-regulated	Unknown
csgE	0.426	0.235	1.39	0.225	1.672	0.896	4.972	2.077	4.118	Up-regulated	Unknown
dinI	0.45	0.744	1.224	1.07	0.379	1.136	9.065	4.61	11.753	Up-regulated	Unknown
pliG	6.613	5.006	2.547	3.056	3.243	4.521	15.918	13.5	14.384	Up-regulated	Unknown
hns	149.697	163.045	34.631	147.927	29.695	127.295	557.359	830.325	1045.18	Up-regulated	Unknown
insI-2	4.615	5.002	3.19	5.408	1.132	1.881	15.065	7.875	18.683	Up-regulated	Unknown
ydbD	0.312	0.396	0.366	0.456	0.121	0.212	1.219	0.737	1.253	Up-regulated	Unknown
mlc	7.983	8.54	3.01	6.97	2.288	3.606	25.171	21.427	24.731	Up-regulated	Unknown
tqsA	13.003	10.693	8.614	14.496	15.387	9.387	26.603	50.555	54.626	Up-regulated	Unknown
zinT	0.085	0.702	0	0.674	0	0.429	1.936	3.857	3.454	Up-regulated	Unknown
yfaP	1.782	1.53	1.008	1.807	1.798	2.879	0.499	0.417	0.413	Down-regulated	Unknown
hyfC	1.11	1.158	0.635	1.111	0.786	1.032	0.409	0.085	0	Down-regulated	Unknown
recN	10.93	9.576	10.366	13.092	11.656	8.495	136.562	91.037	162.358	Up-regulated	Unknown
gutM	3.692	3.049	1.841	3.656	2.846	2.718	11.311	6.975	14.277	Up-regulated	Unknown
galP	5.161	3.409	3.109	8.051	4.807	5.111	31.9	64.45	91.65	Up-regulated	Unknown
yhhJ	16.591	17.886	15.529	18.172	23.842	18.763	175.893	90.214	144.485	Up-regulated	Unknown
rbbA	27.712	30.354	18.561	33.319	35.129	24.984	305.74	157.644	218.502	Up-regulated	Unknown
yhiI	55.695	68.341	36.945	59.807	105.778	52.551	457.619	266.201	302.889	Up-regulated	Unknown
yhiM	17.567	35.092	19.336	81.073	14.417	74.076	1206.89	766.902	1006.42	Up-regulated	Unknown
yhiN	9.484	13.001	4.106	7.95	7.2	7.146	58.671	38.58	53.673	Up-regulated	Unknown
uspA	50.673	64.34	30.189	57.081	20.768	36.313	367.973	202.215	254.035	Up-regulated	Unknown
prlC	107.081	113.849	87.81	133.863	88.347	131.338	259.204	446.975	591.056	Up-regulated	Unknown
slp	75.506	128.889	191.77	224.686	232.916	429.226	1317.15	2573.79	1228.86	Up-regulated	Unknown
dctR	4.485	9.129	6.92	19.663	4.034	18.823	162.318	161.385	243.196	Up-regulated	Unknown
hdeB	141.593	241.107	146.824	1143.02	101.393	402.265	2964.01	2341.75	4169.2	Up-regulated	Unknown
hdeA	330.973	551.806	341.361	3171.51	360.228	1726.57	7430.98	7238.24	9701.72	Up-regulated	Unknown
hdeD	170.501	338.082	114.488	1135.09	113.613	820.92	2495.89	3421.13	3635.07	Up-regulated	Unknown
gadW	7.597	4.266	3.553	21.784	6.26	20.518	51.469	46.221	57.726	Up-regulated	Unknown
ccp	0.872	0.196	0.991	0.69	0.733	0.3	6.727	2.897	5.974	Up-regulated	Unknown
yhjG	15.962	15.799	10.844	24.776	12.788	21.501	46.054	52.702	95.077	Up-regulated	Unknown
yhjR	0.879	0.484	0	0	0	0	2.565	8.143	8.498	Up-regulated	Unknown
bcsE	6.095	6.749	5.633	11.498	9.598	9.648	67.595	80.483	124.653	Up-regulated	Unknown
bcsF	4.615	7.146	6.903	6.855	5.821	6.553	49.486	37.968	70.27	Up-regulated	Unknown
bcsG	3.33	4.41	2.976	6.476	4.047	6.282	30.24	28.012	44.552	Up-regulated	Unknown
yiaF	135.149	141.634	65.917	150.304	67.591	87.294	412.763	302.574	555.725	Up-regulated	Unknown
wecH	2.947	2.02	5.201	2.29	5.33	4	12.946	11.629	15.159	Up-regulated	Unknown
bax	194.683	138.471	94.632	275.021	57.235	59.304	776.207	319.475	853.515	Up-regulated	Unknown
yiaV	2.777	2.976	3.126	3.241	4.096	1.537	9.806	7.979	11.866	Up-regulated	Unknown
grxC	91.867	79.487	37.77	155.632	56.545	89.032	540.163	292.814	456.36	Up-regulated	Unknown
yicR	24.505	24.746	14.677	22.427	28.539	16.089	73.765	52.667	91.713	Up-regulated	Unknown
yicC	12.949	17.361	7.948	34.832	11.318	21.518	73.275	42.468	95.553	Up-regulated	Unknown
dinD	0.671	1.885	0.219	0.638	0.339	0.762	18.098	8.542	9.734	Up-regulated	Unknown
gltS	54.098	59.383	30.42	47.362	44.868	31.817	190.528	86.505	175.268	Up-regulated	Unknown
yicH	81.489	113.608	77.114	71.679	108.874	90.903	229.794	263.74	333.259	Up-regulated	Unknown
yicI	2.46	1.696	2.857	2.838	2.53	2.713	9.699	5.099	9.004	Up-regulated	Unknown
yicJ	0.481	0.661	1.307	0.952	2.29	0.606	3.856	3.631	3.484	Up-regulated	Unknown
yicL	11.329	15.937	12.843	23.264	22.376	14.448	56.87	57.242	90.739	Up-regulated	Unknown
yicN	5.624	5.855	4.521	11.04	6.168	10.8	30.605	15.913	37.584	Up-regulated	Unknown
yidG	17.088	12.094	15.267	23.445	17.96	14.826	64.635	54.445	115.043	Up-regulated	Unknown
yidH	14.483	11.564	9.348	23.7	10.705	14.863	61.849	42.128	82.155	Up-regulated	Unknown
yidR	4.837	4.544	3.572	9.843	3.284	5.937	27.501	19.276	26.255	Up-regulated	Unknown
yidB	5.275	5.272	0.906	6.377	1.167	3.854	17.981	11.977	25.763	Up-regulated	Unknown
lexA	26.191	26.283	23.542	45.67	28.904	37.07	151.558	181.547	267.433	Up-regulated	Unknown
fxsA	27.402	28.187	11.492	23.728	16.596	36.339	170.734	101.884	168.363	Up-regulated	Unknown
groS	43.704	40.443	11.679	71.624	15.839	35.422	682.294	241.616	569.266	Up-regulated	Unknown
tamA	8.272	10.022	3.613	16.344	3.76	5.603	28.236	20.833	38.348	Up-regulated	Unknown
tabA	4.279	5.452	1.197	8.328	2.673	6.172	24.185	17.344	22.692	Up-regulated	Unknown
yjhC	0.742	0.49	0.485	1.019	0.083	0.375	3.032	1.665	3.445	Up-regulated	Unknown
insI-3	4.856	4.843	3.19	5.331	1.213	2.245	15.065	7.804	18.683	Up-regulated	Unknown
yicS	0	0.622	0.205	0.597	1.267	0.475	6.266	2.48	6.556	Up-regulated	Unknown
topAI	1.932	1.773	2.101	2.04	0.361	1.625	7.516	3.767	7.471	Up-regulated	Unknown
dinQ	26.373	18.511	12.909	21.935	23.283	36.611	182.363	144.639	202.685	Up-regulated	Unknown
tisB	8.615	10.163	6.693	12.673	6.209	10.872	93.721	68.398	92.802	Up-regulated	Unknown
