# Supplementary material for: The Plasmid pEX18Gm Indirectly Increases Caenorhabditis elegans Fecundity by Accelerating Bacterial Methionine Synthesis
Source: Int J Mol Sci. 2022 Apr 30;23(9):5003. doi: 10.3390/ijms23095003 (PMC9102816; doi:10.3390/ijms23095003)
Supplement: Supplementary file 1 [file ijms-23-05003-s001.zip › Table S2. List of oligonucleotides.xlsx]

## Sheet: Sheet1
	Name	Forward (5' -> 3')	Reverse (5' -> 3')	Use
gapA mRNA expression	gapA	GCTGGTGCGAAGAAAGTG	GTGGTGCAGGAAGCGTTG	qRT-PCR of gapA as house-keeping gene
metH mRNA expression	metH	CTTCGCTAACTACTGTCTCGC	TTTGTTGTAATCATCGTGCTG	qRT-PCR of metH
metA mRNA expression	metA	GGGCCTGGTGGAGTTTAA	TTCGGTGCGAGTTTGCTT	qRT-PCR of metA
metB mRNA expression	metB	CCTGGTGGGCAAACAATA	GCAACGACGGGTGATACA	qRT-PCR of metB
metC mRNA expression	metC	TAACCCATTTCTCCTTACAAC	AATCCTGACTCGGTTCATAG	qRT-PCR of metC
malY mRNA expression	malY	GCCCACAGAATCCTACCG	TAGCAACGCCCAGTCTCC	qRT-PCR of malY
metR mRNA expression	metR	GCTTCCGGCTATTTGTGC	CGTCTGCTGCGGTTCATT	qRT-PCR of metR
E. coli Gene Knockout	metH-UHA	GGCTTTACCTGCACCGGAAGCGTG	CACATATAAAAAGCCATATCAAGACTTGCTCCCAACACGCTCAA	PCR of metH upstream gene
	metH-DHA	CGTGGCCGAGGAGCAGGACTGA TTCACAAATCTGTCACTTTTCCTT	GAACGCCGTTTGCCTGGGTGATC	PCR of metH downstream gene
	metH-CRC	TTGAGCGTGTTGGGAGCAAGTCTTGATATGGCTTTTTATATGTG	AAGGAAAAGTGACAGATTTGTGAATCAGTCCTGCTCCTCGGCCACG	PCR of metH cassette gene
	metH-con	TTGAGCGTGTTGGGAGCAAGT	GAACGCCGTTTGCCTGGGTGATC	Confirm ΔmetH E. coli OP50 mutant
Plasmid Construction	ΔsacB	CGTTCATGTCTCCTTTTTTATGTACT	GGTGCACTCTCAGTACAATCTGCTCT	Konckout sacB gene
	sacB	ATAATCGGCATTTTCTTTTG	ATGAACATCAAAAAGTTTGCA	PCR of sacB gene
