# Supplementary figures and images for: The Plasmid pEX18Gm Indirectly Increases Caenorhabditis elegans Fecundity by Accelerating Bacterial Methionine Synthesis
Source: MDPI journal article supplement (doi:10.3390/ijms23095003), 2022-04-30

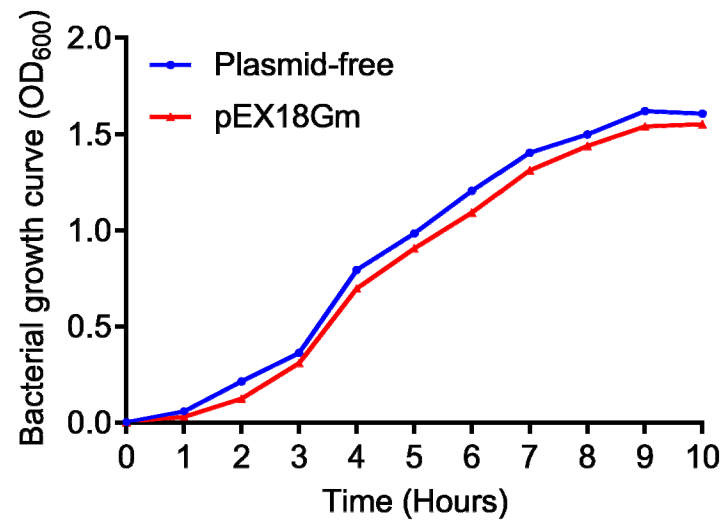

**Figure S1.** The response of *E. coli* OP50 growth rate to plasmid pEX18Gm in liquid LB medium.

Supplement: s1 [file s1]
